# Supplementary figures and images for: Identification of MicroRNA–mRNA Networks in Melanoma and Their Association with PD-1 Checkpoint Blockade Outcomes
Source: MDPI journal article supplement (doi:10.3390/cancers13215301), 2021-10-22

a.

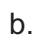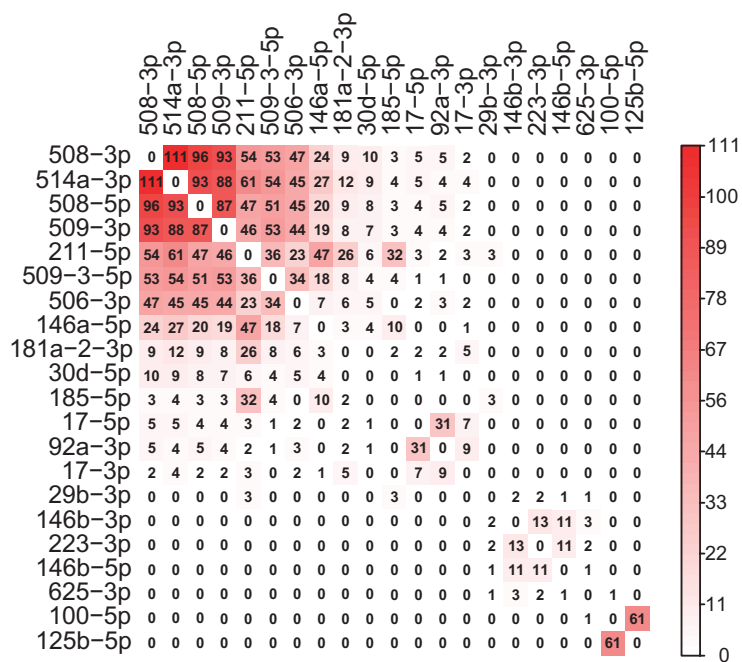

Figure S2. Network Analysis of Global MicroRNA:mRNA Associations in Melanoma Cell Lines.

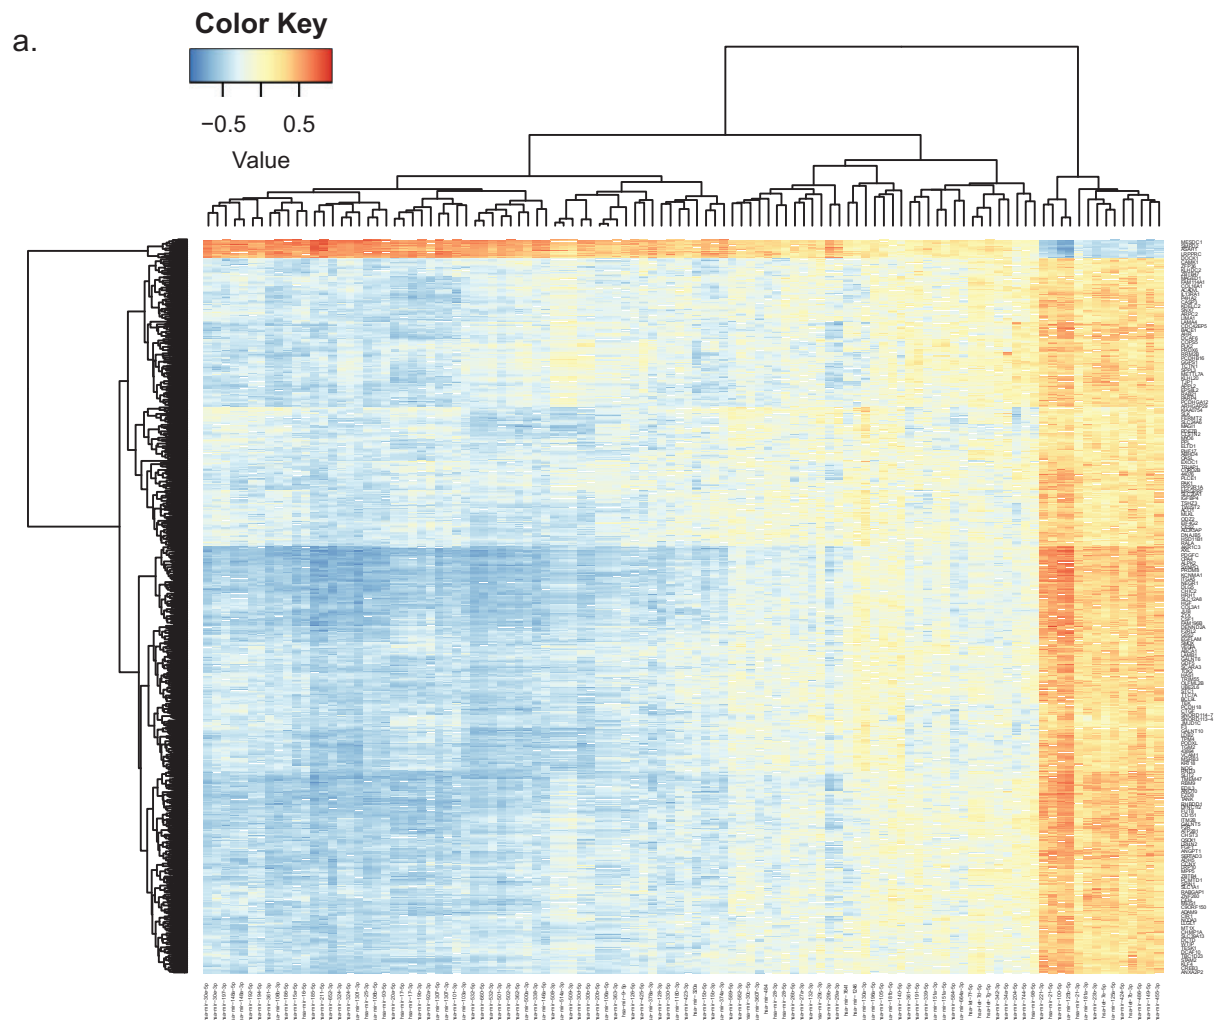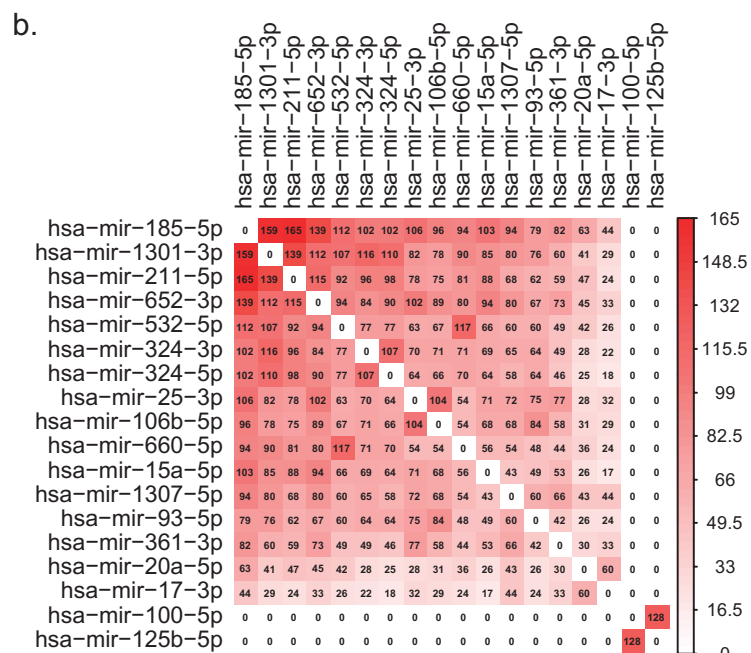

Supplement: s1 [file s1]
